# Supplementary material for: Coordination and catalysis of Zn2+ in epoxy-based vitrimers
Source: Royal Society of Chemistry journal article supplement (doi:10.1039/c6py00752j), 2016-01-01
Supplement: c6py00752j1.pdf [file c6py00752j1.pdf]

## Supplementary data

### Coordination and Catalysis of Zn<sup>2+</sup> in Epoxy-Based Vitrimers

A. Demongeot,<sup>a</sup> S.J. Mognier,<sup>a</sup> S. Okada,<sup>b</sup> C. Soulié-Ziakovic<sup>a</sup> and F. Tournilhac<sup>\*a</sup>

<sup>a</sup> *Laboratoire Matière Molle et Chimie, UMR 7167 ESPCI-CNRS, Ecole Supérieure de Physique et de Chimie Industrielles de la Ville de Paris ESPCI ParisTech, PSL Research University, 10 rue Vauquelin 75005 Paris, France. E-mail : francois.tournilhac@espci.fr*

<sup>b</sup> *Department of Chemistry, University of Tokyo, Hongo, Bunkyo-ku, Tokyo 113-0033 Japan.*

## 1. Materials - Fatty acids

Pripol® 1040 was kindly provided by Croda. This material, usually referred as trimer acid is actually a complex mixture of polycarboxylic acids produced from coupling reactions of bio-based unsaturated fatty acids (mainly oleic and linoleic) and partially hydrogenated. According to the manufacturer's specifications, Pripol 1040 contains 77 wt% of tricarboxylic acid trimers and 23 wt% of dicarboxylic acid dimers (70 mol% and 30 mol% respectively). IR and NMR data are consistent with the cycloaliphatic structure generally accepted [1-3].

Isomers and acyclic dimers may be also present.[4-6] Feed ratios in epoxy-acid reactions were calculated on the basis of the acid value given by the manufacturer, which corresponds to an equivalent weight of 296 g per mole of COOH functions.

| $\delta$ (ppm) / TMS   | attribution                                              | integral found | expected   |
|------------------------|----------------------------------------------------------|----------------|------------|
| 0.89 (triplet)         | CH <sub>3</sub>                                          | 76             | 74 to 82 * |
| expected: 0.80 to 1.25 | cyclic CH (axial)                                        |                |            |
| expected: 1.13 to 1.18 | cycle—CH <sub>2</sub> —(CH <sub>2</sub> ) <sub>n</sub> — |                |            |
| 1.26                   | CH <sub>2</sub> (chain)                                  |                |            |
| 1.63                   | CH <sub>2</sub> —CH <sub>2</sub> —COOH                   |                |            |
| 1.5 to 1.8             | cyclic CH (equatorial)                                   |                |            |
| 2.0 and 2.5            | allylic CH                                               |                |            |
| expected 5.10 to 5.40  | -CH=CH-                                                  | 0.8            | 0 to 8 *   |
| 2.34 (triplet)         | -CH <sub>2</sub> -COOH                                   | 5.4            | 5.4        |
| 9.3 (very broad)       | -COOH                                                    | 1.3            | 2.7        |

**Table S1.** <sup>1</sup>H NMR (CDCl<sub>3</sub>) bands attribution, \*depending on residual unsaturation

| wavelength (cm <sup>-1</sup> ) | attribution [4]                                       |                         |
|--------------------------------|-------------------------------------------------------|-------------------------|
| 2250-3500                      | $\nu_{\text{O-H}}$                                    | acid                    |
| 2953 (shoulder)                | $\nu_{\text{a}} \text{CH}_3$                          |                         |
| 2922                           | $\nu_{\text{a}} \text{CH}_2$                          |                         |
| 2870 (shoulder)                | $\nu_{\text{s}} \text{CH}_3$                          |                         |
| 2853                           | $\nu_{\text{s}} \text{CH}_2$                          |                         |
| 1707                           | $\nu_{\text{C=O}}$                                    | acid                    |
| 1461                           | $\delta \text{CH}_2$                                  | scissoring              |
| 1413                           | $\nu_{\text{C-O}} + \delta_{\text{OH}} \text{ comb.}$ | acid                    |
| 1375                           | $\delta_{\text{s}} \text{CH}_3$                       |                         |
| 1285 and 1238                  | $\nu_{\text{C-O}}$                                    | acid (H-bond dimerized) |
| 1119                           | $\nu_{\text{C-O}}$                                    | acid (not dimerized)    |
| 933                            | $\delta_{\text{OH}}$                                  | out-of-plane bending    |
| 724                            | $\delta (\text{CH}_2)_n$                              | rocking                 |

**Table S2.** ATR-IR bands attribution

## 2. Fatty acid-based zinc dicarboxylate (compound 1)

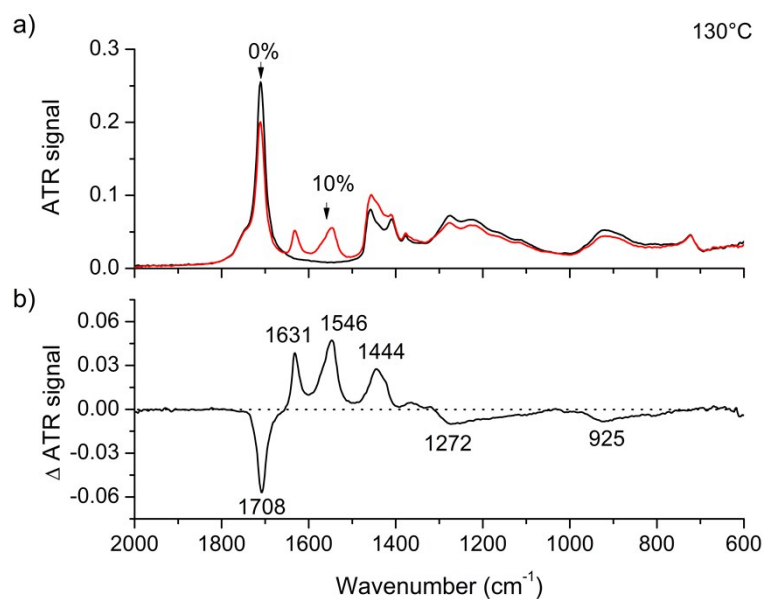

**Figure S1.** a) ATR-IR spectrum of starting fatty acid (black) and fatty acid-based zinc dicarboxylate 10 mol% (red), b) ATR signal difference.

## 3. Vitrimer synthesis (compound 2)

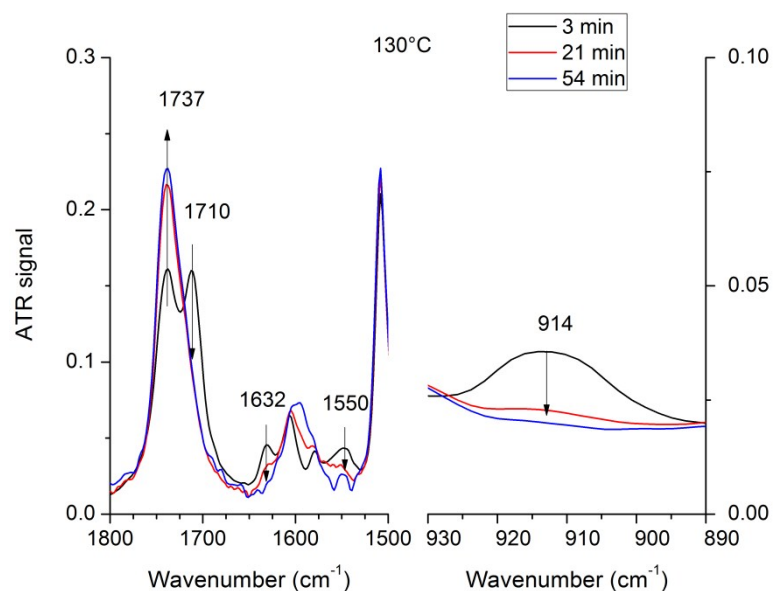

**Figure S2.** Carbonyl (1800-1500 cm<sup>-1</sup>) and epoxy (930-890 cm<sup>-1</sup>) regions of FTIR spectra during the curing of epoxy-acid networks at 130°C. Spectra were taken every 3 min.

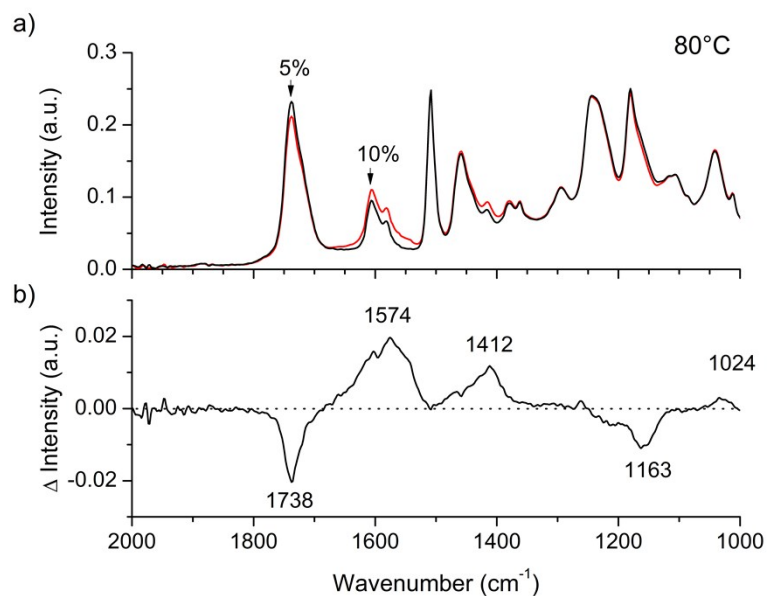

**Figure S3.** a) ATR-IR spectra of 5 mol% Zn-catalyzed epoxy vitrimer (black) and 10 mol% Zn-catalyzed vitrimer (red). b) ATR-IR spectrum difference  $A(10\%) - A(5\%)$ .

#### 4. 3-phenoxy-1,2-propanediol (compound 3)

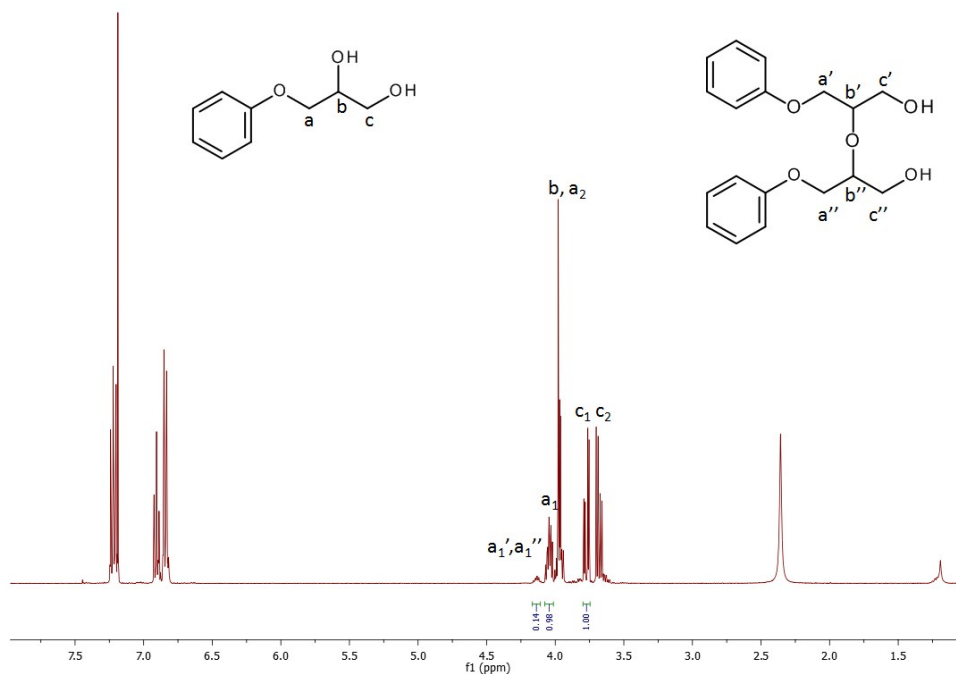

**Figure S4.** NMR of compound 3 in  $CDCl_3$



## 7. X-ray powder diffraction

X-ray powder diffraction (XRD) was performed using a Philips X'Pert diffractometer. Co K $\alpha$  radiation (1.79Å) was used at 40 kV and 40 mA. A counting time of 25 s per 0.05 ° step was used for the 2 $\theta$  range 15–90 °.

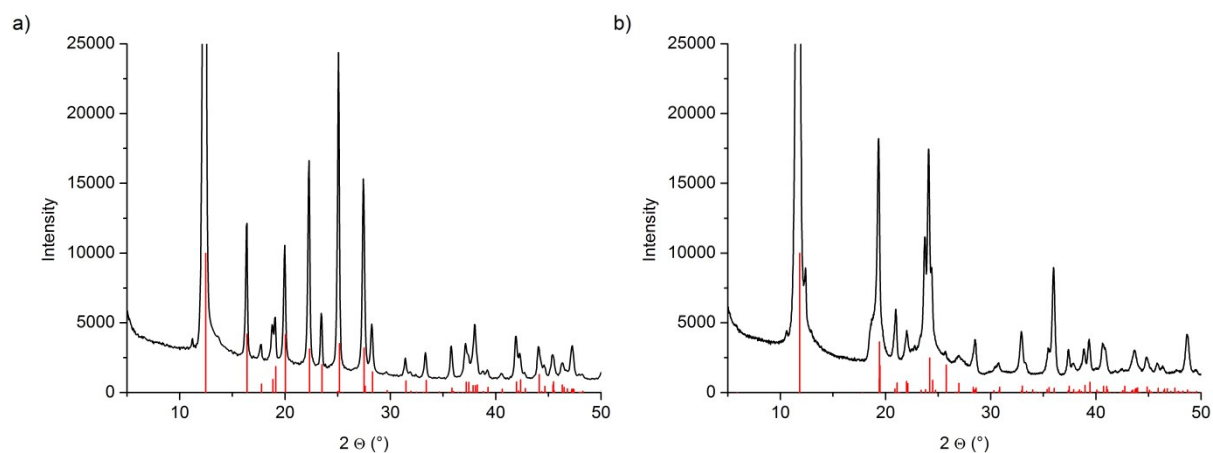

**Figure S7.** a) X-ray powder diffraction pattern of zinc acetate dihydrate and simulated (bottom, red) based on the crystal structure proposed by Ishioka[7] b) X-ray powder diffraction pattern of anhydrous zinc acetate and simulated (bottom, red) based on the crystal structure proposed by Clegg[8]

## 8. EXAFS Spectroscopy

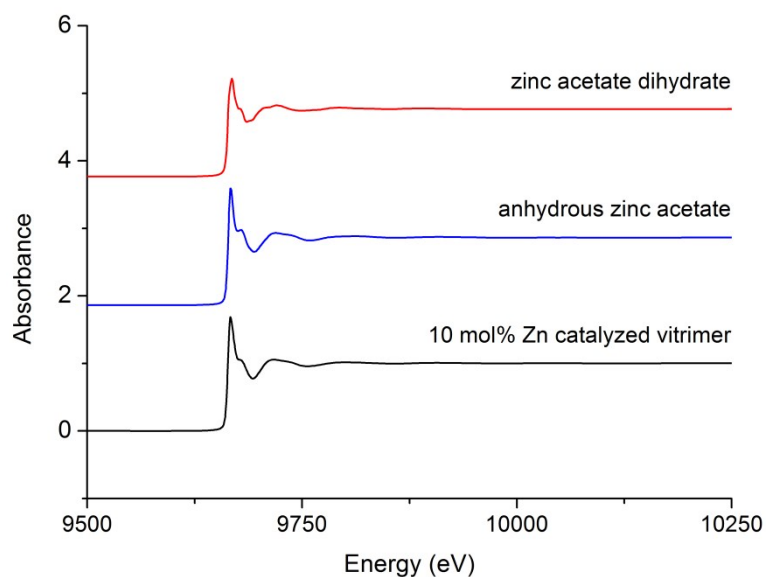

**Figure S8.** X-Ray absorption spectra ( $\mu(E)$  plots) of anhydrous zinc acetate (top, red), zinc acetate dihydrate (middle, blue) and the 10 mol% Zn-catalyzed epoxy-acid vitrimer system (bottom, black).

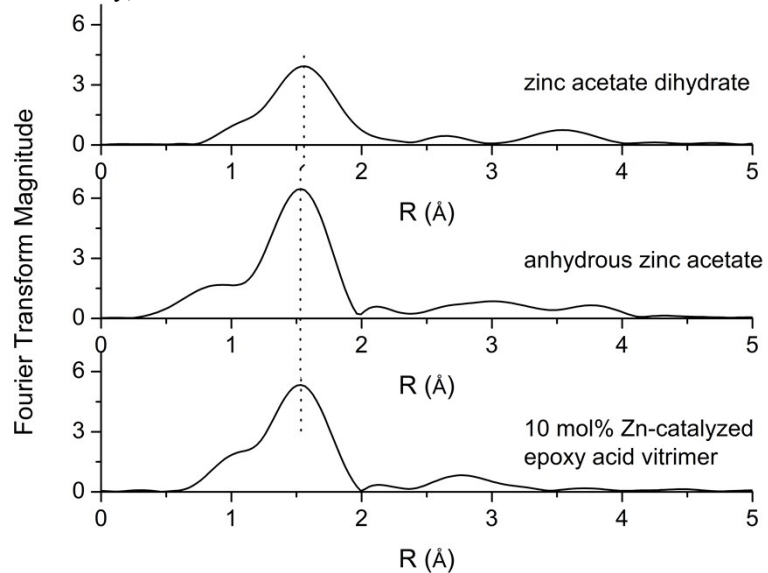

**Figure S9.** Radial structure functions of anhydrous zinc acetate (top), zinc acetate dihydrate (middle) and the 10 mol% Zn-catalyzed epoxy-acid vitrimer system (bottom).

## 8. Shift in carbonyl vibration by coordination with Zn<sup>2+</sup>

In order to estimate the IR peak shift by zinc coordination, four complexes with Zn<sup>2+</sup> and two molecules without Zn<sup>2+</sup> were calculated (Figure S10, Table S3). The calculated shifts for Zn...O=C coordination, with or without chelation are consistent with experimental data.

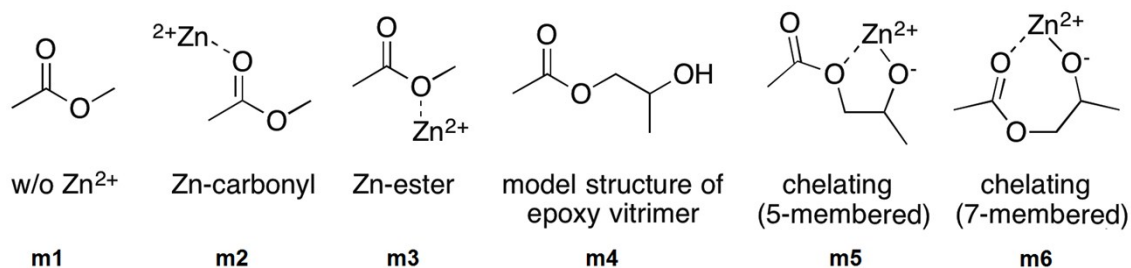

**Figure S10.** Possible complexation models of an ester with a zinc cation.

|            | model complex                     | $\omega$     | shift | O-Zn distance [Å]                  |
|------------|-----------------------------------|--------------|-------|------------------------------------|
| <b>m 1</b> | w/o Zn <sup>2+</sup>              | 1750         | –     | NA                                 |
| <b>m 2</b> | Zn-carbonyl<br>(Structure I)      | 1373<br>1589 | 161   | 1.818                              |
| <b>m 3</b> | Zn-ester                          | 1760         | –10   | 2.800                              |
| <b>m 4</b> | model structure of epoxy vitrimer | 1743         | –     | NA                                 |
| <b>m 5</b> | chelating (5-membered)            | 1853         | –103  | 1.826 (alcoxy)<br>2.018 (ester)    |
| <b>m 6</b> | chelating (7-membered)            | 1581         | 169   | 1.812 (alcoxy)<br>1.921 (carbonyl) |

**Table S3.** Shift in calculated IR frequencies ( $\omega$ , cm<sup>-1</sup>) of carbonyls by Zn coordination.

Calculations were performed with a Gaussian 09 program package.[9] The density functional theory (DFT) method was employed using M06.[10] Structures were optimized with a basis set consisting of the LANL2DZ basis set including a double-zeta valence basis set with the Hay and Wadt effective core potential (ECP).[11] Each stationary point was adequately characterized by normal coordinate analysis (no imaginary frequencies for an equilibrium structure).



## 9. Coordination of Zn<sup>2+</sup> by the $\beta$ -hydroxy-alkoxide anion

In the particular case of  $\beta$ -diol structures, produced by transesterification, the coordination of Zn<sup>2+</sup> is examined (Figure 5). The calculation technique is the same as above. Chelation is favored.

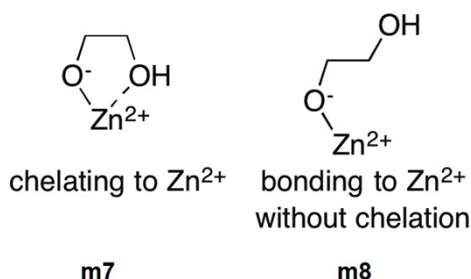

**Figure S11.** Complexation models of an ethylene glycol molecule and its anion with a zinc cation.

| model complex |                                                                    | $\omega$                      | O-Zn distance [Å] | C-O distance [Å]          |
|---------------|--------------------------------------------------------------------|-------------------------------|-------------------|---------------------------|
| <b>m7</b>     | chelating to Zn <sup>2+</sup>                                      | 819 (C-OH)                    | 1.984 (alcohol)   | 1.509 (C-OH)              |
|               |                                                                    | <b>1053 (C-O<sup>-</sup>)</b> | 1.828 (alcoxy)    | 1.453 (C-O <sup>-</sup> ) |
| <b>m8</b>     | bonding to Zn <sup>2+</sup> without chelation (unstable structure) | <b>1014 (C-O<sup>-</sup>)</b> | 1.823 (alcoxy)    | 1.394 (C-OH)              |
|               |                                                                    | 1143 (C-OH)                   |                   | 1.428 (C-O <sup>-</sup> ) |

**Table S4.** Calculated IR frequencies ( $\omega$ , cm<sup>-1</sup>) of C-O bond by Zn coordination.

## 10. Calculated Coordinates

SCF Done: E(RM06) = -268.183809469 A.U. after 13 cycles

| Center Number | Atomic Number | Atomic Type | Coordinates (Angstroms) |           |           |
|---------------|---------------|-------------|-------------------------|-----------|-----------|
|               |               |             | X                       | Y         | Z         |
| 1             | 6             | 0           | -0.789544               | -2.554025 | -0.403    |
| 2             | 1             | 0           | -0.278229               | -3.368703 | -0.923377 |
| 3             | 1             | 0           | -0.428667               | -1.614529 | -0.831401 |
| 4             | 1             | 0           | -1.86703                | -2.637595 | -0.544683 |
| 5             | 6             | 0           | -0.466303               | -2.601462 | 1.061594  |
| 6             | 8             | 0           | -1.271996               | -2.69337  | 1.992786  |
| 7             | 8             | 0           | 0.891216                | -2.525049 | 1.260654  |
| 8             | 6             | 0           | 1.352463                | -2.554218 | 2.642793  |
| 9             | 1             | 0           | 1.072274                | -3.499468 | 3.116623  |
| 10            | 1             | 0           | 2.435333                | -2.452662 | 2.588273  |
| 11            | 1             | 0           | 0.90937                 | -1.729736 | 3.208777  |

**Table S5.** Compound **m1** (w/o Zn<sup>2+</sup>)

SCF Done: E(RM06) = -332.908344000 A.U. after 14 cycles

| Center<br>Number | Atomic<br>Number | Atomic<br>Type | Coordinates (Angstroms) |           |           |
|------------------|------------------|----------------|-------------------------|-----------|-----------|
|                  |                  |                | X                       | Y         | Z         |
| 1                | 6                | 0              | -0.738877               | -2.774    | -0.526454 |
| 2                | 1                | 0              | -0.425153               | -3.791724 | -0.776527 |
| 3                | 1                | 0              | -0.209473               | -2.117549 | -1.231176 |
| 4                | 1                | 0              | -1.81377                | -2.671579 | -0.685117 |
| 5                | 6                | 0              | -0.324853               | -2.443451 | 0.857039  |
| 6                | 8                | 0              | 0.815877                | -2.860577 | 1.25606   |
| 7                | 6                | 0              | 1.484503                | -2.639685 | 2.586644  |
| 8                | 1                | 0              | 0.885255                | -3.134842 | 3.352075  |
| 9                | 1                | 0              | 2.454143                | -3.115747 | 2.464633  |
| 10               | 1                | 0              | 1.578424                | -1.565294 | 2.750954  |
| 11               | 8                | 0              | -1.055922               | -1.726047 | 1.700936  |
| 12               | 30               | 0              | -2.600284               | -0.815375 | 1.999253  |

**Table S6.** Compound **m2** (Zn-carbonyl)

SCF Done: E(RM06) = -333.651594550 A.U. after 12 cycles

| Center<br>Number | Atomic<br>Number | Atomic<br>Type | Coordinates (Angstroms) |           |           |
|------------------|------------------|----------------|-------------------------|-----------|-----------|
|                  |                  |                | X                       | Y         | Z         |
| 1                | 6                | 0              | -0.882763               | -2.484442 | -0.345629 |
| 2                | 1                | 0              | -0.15232                | -2.973969 | -0.997222 |
| 3                | 1                | 0              | -0.844357               | -1.411019 | -0.558405 |
| 4                | 1                | 0              | -1.882901               | -2.865106 | -0.553076 |
| 5                | 6                | 0              | -0.537253               | -2.732278 | 1.092824  |
| 6                | 8                | 0              | -1.262638               | -3.23206  | 1.95426   |
| 7                | 6                | 0              | 1.228454                | -2.483245 | 2.732807  |
| 8                | 1                | 0              | 1.207158                | -3.539696 | 3.012507  |
| 9                | 1                | 0              | 2.250673                | -2.10122  | 2.728742  |
| 10               | 1                | 0              | 0.600921                | -1.91484  | 3.424374  |
| 11               | 30               | 0              | 2.57625                 | -0.976522 | -0.283361 |
| 12               | 8                | 0              | 0.749924                | -2.314002 | 1.364549  |

**Table S7.** Compound **m3** (Zn-ester)

SCF Done: E(RM06) = -727.908719412 A.U. after 15 cycles

| Center Number | Atomic Number | Atomic Type | Coordinates (Angstroms) |           |           |
|---------------|---------------|-------------|-------------------------|-----------|-----------|
|               |               |             | X                       | Y         | Z         |
| 1             | 6             | 0           | -1.975689               | -0.622175 | 0.219614  |
| 2             | 1             | 0           | -2.4587                 | -1.610018 | 0.125438  |
| 3             | 1             | 0           | -1.988434               | -0.310267 | 1.27461   |
| 4             | 6             | 0           | -3.973811               | 0.654819  | -0.30693  |
| 5             | 6             | 0           | -4.706027               | 0.070506  | 0.738377  |
| 6             | 6             | 0           | -4.561953               | 1.623644  | -1.135866 |
| 7             | 6             | 0           | -6.036526               | 0.467755  | 0.945797  |
| 8             | 1             | 0           | -4.262476               | -0.677533 | 1.388601  |
| 9             | 6             | 0           | -5.886194               | 2.007376  | -0.917718 |
| 10            | 1             | 0           | -3.961161               | 2.05564   | -1.92975  |
| 11            | 6             | 0           | -6.632905               | 1.431286  | 0.125225  |
| 12            | 1             | 0           | -6.604167               | 0.01754   | 1.755182  |
| 13            | 1             | 0           | -6.337996               | 2.758355  | -1.558952 |
| 14            | 1             | 0           | -7.661885               | 1.732851  | 0.293239  |
| 15            | 8             | 0           | -2.657809               | 0.336263  | -0.607959 |
| 16            | 6             | 0           | -0.536743               | -0.671003 | -0.251869 |
| 17            | 1             | 0           | -0.511503               | -0.518508 | -1.340935 |
| 18            | 6             | 0           | 0.104599                | -2.014743 | 0.07453   |
| 19            | 1             | 0           | -0.395362               | -2.834684 | -0.458773 |
| 20            | 1             | 0           | 0.07117                 | -2.193129 | 1.159114  |
| 21            | 8             | 0           | 0.166659                | 0.378717  | 0.435315  |
| 22            | 8             | 0           | 1.480183                | -1.877512 | -0.375867 |
| 23            | 6             | 0           | 2.442563                | -2.850313 | -0.15369  |
| 24            | 8             | 0           | 3.580124                | -2.647642 | -0.563328 |
| 25            | 6             | 0           | 2.006206                | -4.090987 | 0.590419  |
| 26            | 1             | 0           | 1.692775                | -3.843829 | 1.610438  |
| 27            | 1             | 0           | 1.167609                | -4.585796 | 0.089744  |
| 28            | 1             | 0           | 2.852413                | -4.776013 | 0.635478  |
| 29            | 1             | 0           | 1.085831                | 0.433489  | 0.104912  |

**Table S8.** Compound **m4** (model structure of epoxy vitrimer)

SCF Done: E(RM06) = -447.217644252 A.U. after 16 cycles

| Center Number | Atomic Number | Atomic Type | Coordinates (Angstroms) |           |           |
|---------------|---------------|-------------|-------------------------|-----------|-----------|
|               |               |             | X                       | Y         | Z         |
| 1             | 6             | 0           | 2.330919                | -0.787785 | -0.099781 |
| 2             | 1             | 0           | 2.239776                | -0.86781  | -1.189884 |
| 3             | 1             | 0           | 3.060772                | -1.526204 | 0.246877  |
| 4             | 6             | 0           | 0.989136                | -1.087134 | 0.578949  |
| 5             | 1             | 0           | 0.474468                | -1.945325 | 0.142771  |
| 6             | 1             | 0           | 1.083596                | -1.204571 | 1.661504  |
| 7             | 8             | 0           | 0.098805                | 0.124538  | 0.377851  |
| 8             | 8             | 0           | 2.841355                | 0.52649   | 0.263654  |
| 9             | 6             | 0           | -1.331423               | -0.087756 | 0.243546  |
| 10            | 6             | 0           | -2.039967               | 1.219919  | 0.098126  |
| 11            | 1             | 0           | -1.694469               | 1.755902  | -0.793255 |
| 12            | 1             | 0           | -3.109665               | 1.040281  | -0.009531 |
| 13            | 1             | 0           | -1.889356               | 1.845404  | 0.985459  |
| 14            | 8             | 0           | -1.763021               | -1.216413 | 0.261971  |
| 15            | 30            | 0           | 1.412756                | 1.655647  | 0.40541   |

**Table S9.** Compound **m5** (chelating (5-membered))

SCF Done: E(RM06) = -447.253363393 A.U. after 14 cycles

| Center Number | Atomic Number | Atomic Type | Coordinates (Angstroms) |           |           |
|---------------|---------------|-------------|-------------------------|-----------|-----------|
|               |               |             | X                       | Y         | Z         |
| 1             | 6             | 0           | 2.222016                | -0.487288 | -0.234159 |
| 2             | 1             | 0           | 1.812909                | -1.491399 | -0.412733 |
| 3             | 1             | 0           | 3.262117                | -0.606796 | 0.092356  |
| 4             | 6             | 0           | 1.474801                | 0.177605  | 0.923925  |
| 5             | 1             | 0           | 1.821444                | -0.204677 | 1.883809  |
| 6             | 1             | 0           | 1.583838                | 1.27029   | 0.905108  |
| 7             | 8             | 0           | 0.004173                | -0.137976 | 1.006674  |
| 8             | 8             | 0           | 2.280554                | 0.285716  | -1.449199 |
| 9             | 6             | 0           | -0.957513               | 0.359442  | 0.253526  |
| 10            | 6             | 0           | -2.33807                | 0.099277  | 0.73409   |
| 11            | 1             | 0           | -2.669899               | 0.957855  | 1.330802  |
| 12            | 1             | 0           | -3.022373               | -0.000268 | -0.109211 |
| 13            | 1             | 0           | -2.363451               | -0.783344 | 1.37352   |
| 14            | 8             | 0           | -0.743562               | 1.033947  | -0.81484  |
| 15            | 30            | 0           | 0.780498                | 1.150423  | -1.978931 |

**Table S10.** Compound **m6** (chelating (7-membered))

SCF Done: E(RM06) = -294.689929342 A.U. after 9 cycles

| Center Number | Atomic Number | Atomic Type | Coordinates (Angstroms) |           |           |
|---------------|---------------|-------------|-------------------------|-----------|-----------|
|               |               |             | X                       | Y         | Z         |
| 1             | 6             | 0           | -2.711038               | 1.403331  | -0.697969 |
| 2             | 1             | 0           | -2.427223               | 1.15017   | -1.727231 |
| 3             | 1             | 0           | -3.745499               | 1.75983   | -0.698063 |
| 4             | 6             | 0           | -2.626059               | 0.159722  | 0.202231  |
| 5             | 1             | 0           | -3.00472                | -0.731408 | -0.301573 |
| 6             | 1             | 0           | -3.121988               | 0.31199   | 1.164203  |
| 7             | 8             | 0           | -1.877034               | 2.481614  | -0.196394 |
| 8             | 8             | 0           | -1.165186               | -0.065469 | 0.505587  |
| 9             | 30            | 0           | -0.346848               | 1.741782  | 0.475489  |
| 10            | 1             | 0           | -0.938626               | -0.979714 | 0.749294  |

**Table S11.** Compound **m7** (chelating to Zn<sup>2+</sup>)

SCF Done: E(RM06) = -294.630638439 A.U. after 8 cycles

| Center Number | Atomic Number | Atomic Type | Coordinates (Angstroms) |           |           |
|---------------|---------------|-------------|-------------------------|-----------|-----------|
|               |               |             | X                       | Y         | Z         |
| 1             | 6             | 0           | -0.996648               | 1.03303   | 0.130176  |
| 2             | 1             | 0           | -1.409441               | 1.764071  | -0.579046 |
| 3             | 1             | 0           | -1.331985               | 1.266743  | 1.145424  |
| 4             | 6             | 0           | -1.515688               | -0.373807 | -0.254648 |
| 5             | 1             | 0           | -0.725838               | -1.089555 | 0.187194  |
| 6             | 1             | 0           | -1.504195               | -0.536256 | -1.341239 |
| 7             | 8             | 0           | 0.422744                | 1.122495  | 0.002692  |
| 8             | 8             | 0           | -2.746071               | -0.609618 | 0.356314  |
| 9             | 30            | 0           | 1.353207                | -0.403365 | 0.36262   |
| 10            | 1             | 0           | -3.412164               | -1.070015 | -0.189133 |

**Table S12.** Compound **m8** (bonding to Zn<sup>2+</sup> without chelation)

## 11. References

- [1] E. Hablot, B. Donnio, M. Bouquey, L. Avérous, *Polymer*, 2010, **51**, 5895.
- [2] S. Çavuş, A. Gürkaynak, *Polym. Adv. Technol.*, 2006, **17**, 30.
- [3] D. Montarnal, P. Cordier, C. Soulié-Ziakovic, F. Tournilhac, L. Leibler, *J. Polym. Sci. A: Polym. Chem.*, 2008, **46**, 7925.
- [4] D. H. McMahon, E. P. Crowell, *J. Am. Oil Chem. Soc.*, 1974, **51**, 522.
- [5] E. C. Leonard, *J. Am. Oil Chem. Soc.*, 1979, **56**, 782A.
- [6] M. Arca, B. K. Sharma, N. P. J. Price, J. M. Perez, K. M. Doll, *J. Am. Oil Chem. Soc.*, 2012, **89**, 987.
- [7] T. Ishioka, Y. Shibata, M. Takahashi, I. Kanekusa, Y. Kitagawa, T. Nakamura, *Spectrosc. Acta A*, 1998, **54**, 1827.
- [8] W. Clegg, I. Little, B.P. Straughan, *Acta Crystallogr. Sect. C*, 1986, **42**, 1701.
- [9] M. J. Frisch, G. W. Trucks, H. B. Schlegel, G. E. Scuseria, M. A. Robb, J. R. Cheeseman, G. Scalmani, V. Barone, B. Mennucci, G. A. Petersson, H. Nakatsuji, M. Caricato, X. Li, H. P. Hratchian, A. F. Izmaylov, J. Bloino, G. Zheng, J. L. Sonnenberg, M. Hada, M. Ehara, K. Toyota, R. Fukuda, J. Hasegawa, M. Ishida, T. Nakajima, Y. Honda, O. Kitao, H. Nakai, T. Vreven, J. A. Montgomery, Jr., J. E. Peralta, F. Ogliaro, M. Bearpark, J. J. Heyd, E. Brothers, K. N. Kudin, V. N. Staroverov, R. Kobayashi, J. Normand, K. Raghavachari, A. Rendell, J. C. Burant, S. S. Iyengar, J. Tomasi, M. Cossi, N. Rega, N. J. Millam, M. Klene, J. E. Knox, J. B. Cross, V. Bakken, C. Adamo, J. Jaramillo, R. Gomperts, R. E. Stratmann, O. Yazyev, A. J. Austin, R. Cammi, C. Pomelli, J. W. Ochterski, R. L. Martin, K. Morokuma, V. G. Zakrzewski, G. A. Voth, P. Salvador, J. J. Dannenberg, S. Dapprich, A. D. Daniels, Ö. Farkas, J. B. Foresman, J. V. Ortiz, J. Cioslowski, D. J. Fox, Gaussian 09, Revision B.01; Gaussian, Inc.: Wallingford CT, 2010.
- [10] Y. Zhao, D. G. Truhlar, *Theor. Chem. Acc.*, 2008, **120**, 215.
- [11] W. R. Wadt, P. J. Hay, *J. Chem. Phys.*, 1985, **82**, 299.
